# Supplementary material
Source: Springer Nature journal article supplement (https://www.springermedizin.de/resource/supplementary/12876_2010_540_MOESM1_ESM.pdf/9437312)
Supplement: MOESM1 [file 9437312]

148 Cores of Pancreatic tissue  
from 134 patients

Excluded

13 Chronic pancreatitis  
11 Neuroendocrine Tumor  
9 Metastatic cancer to pancreas  
7 Ampullary adenocarcinoma  
5 Pancreatic Cysts  
4 Cholangiocarcinoma  
3 Duodenal adenocarcinoma  
1 Osteoclast-like giant cell tumor

14 Normal samples matched to  
Adenocarcinoma

21 Normal  
60 Pancreatic Adenocarcinoma
